# Supplementary material for: Medium-entropy state quinary keplerate clusters as a remarkable electrocatalyst for small molecule electrooxidation
Source: Royal Society of Chemistry journal article supplement (doi:10.1039/d3qi00316g), 2023-01-01
Supplement: d3qi00316g1.pdf [file d3qi00316g1.pdf]

1

## Supporting Information

2 **Medium-Entropy State Quinary Keplerate Clusters as Remarkable Electrocatalyst for Small**  
3 **Molecule Electrooxidation**

4

5 Mengyang Cao<sup>a\*</sup>, Hongfang Ye<sup>a\*</sup>, Yingying Liu<sup>a</sup>, Jianwen Wang<sup>a</sup>, Yin Zhou<sup>a</sup>, Xianwen Wang<sup>a</sup>,  
6 Shining Wu<sup>a</sup>, Feng Xu<sup>a\*</sup>, Yingpeng Wu<sup>a\*</sup>

7 <sup>a</sup> State Key Laboratory of Chem/Bio-Sensing and Chemometrics, Advanced Catalytic Engineering  
8 Research Center of the Ministry of Education, College of Chemistry and Chemical Engineering,  
9 Hunan University, Changsha, 410082, P. R. China.

10 \* Mengyang Cao and Hongfang Ye contributed equally to this paper

11 \* Email: [feng\\_xu@hnu.edu.cn](mailto:feng_xu@hnu.edu.cn) , [wuyingpeng@hnu.edu.cn](mailto:wuyingpeng@hnu.edu.cn)

12

## 13 **Table of Contents**

14 **Figure S1.** The photograph of solution products.

15 **Figure S2.** Image of 7 single crystal samples of M20-20 ~ M20-26 and a ball-and-stick model of  
16 M20

17 **Figure S3.** Structure of the {Ni<sub>9</sub>} cluster

18 **Figure S4.** IR spectra of M20-7, M20-17, M20-20

19 **Figure S5.** TGA of M20-7, M20-17, M20-20

20 **Figure S6 to Figure S9.** The XPS spectra for as-synthesized M20-20, M20-17, M20-7, M20-9

21 **Figure S10** Photograph of NCNT mixed with M20-20

- 22 **Figure S11 to Figure S14.** Additional electrochemical performance measurements of NCNT-  
23 M20-20 and NCNT-Cu<sub>20</sub> composites
- 24 **Figure S15** XRD results of M20-CuNi, M20-CuCo and M20-20
- 25 **Figure S16** CV comparison of M20-CuNi, M20-CuCo with and without 0.5M MeOH
- 26 **Figure S17** Double layer capacitance comparison of NCNT-M20-20 2:1, M20-Cu<sub>20</sub>, M20-  
27 CuCo, M20-CuNi.
- 28 **Figure S18** The XRD result of M20-20 after chronoamperometry at 0.7V
- 29 **Figure S19** SEM and EDS results of M20-20 after 0.7V, chronoamperometry, metal  
30 element proportion marked left bottom at each element distribution
- 31 **Figure S20** SEM and EDS result of pristine M20-20 bulk with element proportion at  
32 bottom right.
- 33 **Figure S21** Response time test and working potential optimization for glucose detection.
- 34 **Table S1.** Metal composition of the obtained 11 single-crystalline keplerates
- 35 **Table S2.** Synthetic results of M20 keplerates with different metal combinations and amines
- 36 **Table S3.** ICP results of M20-24 obtained in different batches
- 37 **Table S4.** ICP results of crystal samples from using equivalent amounts of starting metal salts
- 38 **Table S5.** Crystallographic data and structure refinement for M20-7, M20 -17 and M20-24
- 39 **Table S6.** MOR performance comparison of NCNT-M20-20 with pervious works
- 40 **NoteS1:** The description of IR spectroscopy and TGA results
- 41 **NoteS2:** Confirm of the current origin of NCNT-M20-20 2:1
- 42 **NoteS3:** Surface coverage species calculation
- 43 **NoteS4:** CV test to understand electrochemical species behavior
- 44 **NoteS5:** Electrochemical active surface area calculation and high methanol concentration  
45 tolerance test
- 46 **{M<sub>20</sub>} Library Synthesis Details**
- 47 **References**

48

49

50

51

52

53

54

55

56

57

58

59

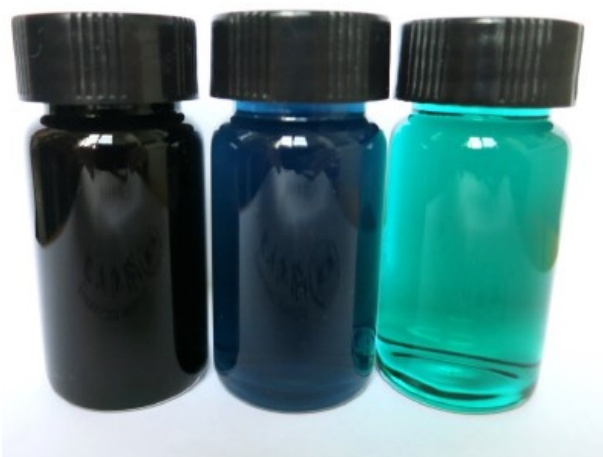

60

61 **Figure S1. The photograph of solution products.** Solution product images of M20-20 (left), M20-  
62 9 (middle) and M20-7 (right).

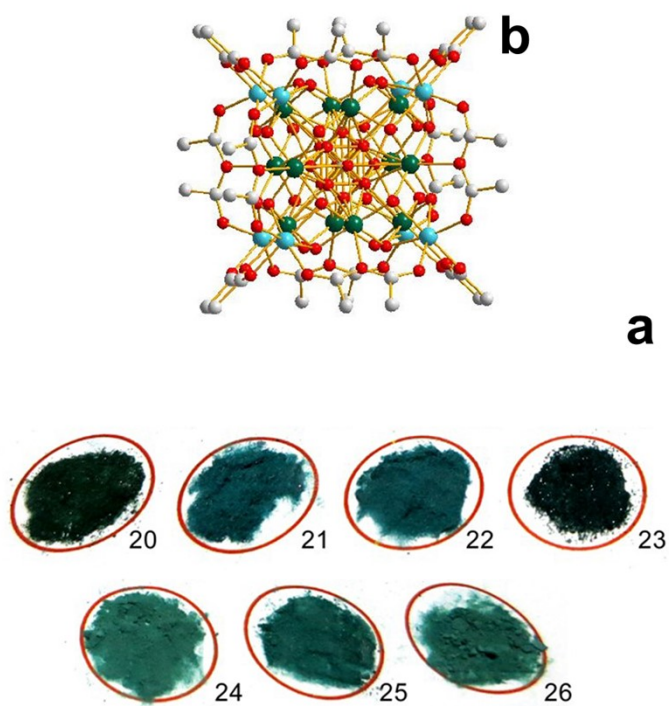

63

64

65 **Figure S2. Image of single crystal samples of M20-20 ~M20-26 and a ball-and-stick model of**  
 66 **{M<sub>20</sub>}.** (a) Image of 7 single crystal samples of M20-20 ~M20-26. (b) A ball-and-stick representation  
 67 of the discrete clusters {M<sub>20</sub>}. The structure contains 20 disordered Cu<sup>2+</sup>, Ni<sup>2+</sup>, Co<sup>2+</sup>, Mn<sup>2+</sup> and Zn<sup>2+</sup>  
 68 ions. H atoms, lattice acetates and water molecules have been omitted for clarity. Color scheme:  
 69 Ni/Co/Mn/Cu/ Zn, blue and dark green; O, red; C, gray.

70

71

72

73

74

75

76

77

78

79

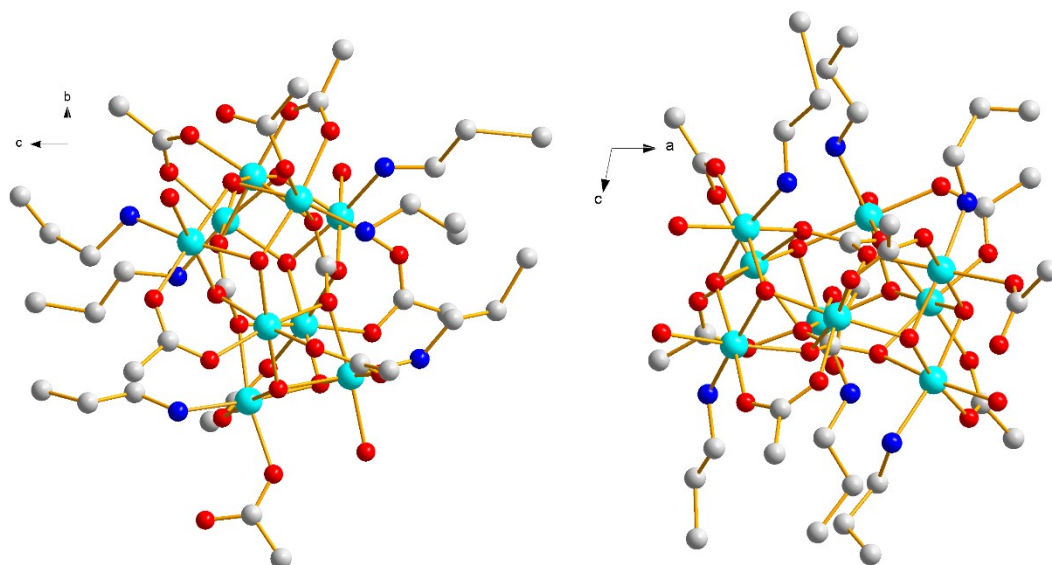

80

81 **Figure S3. Structure of the {Ni<sub>9</sub>} cluster.** Structure of the {Ni<sub>9</sub>} cluster obtained from the reaction  
82 using only Ni(OAc)<sub>2</sub> as the starting material. Color scheme: Cu, light blue; N, dark blue; O, red; C,  
83 gray.

84

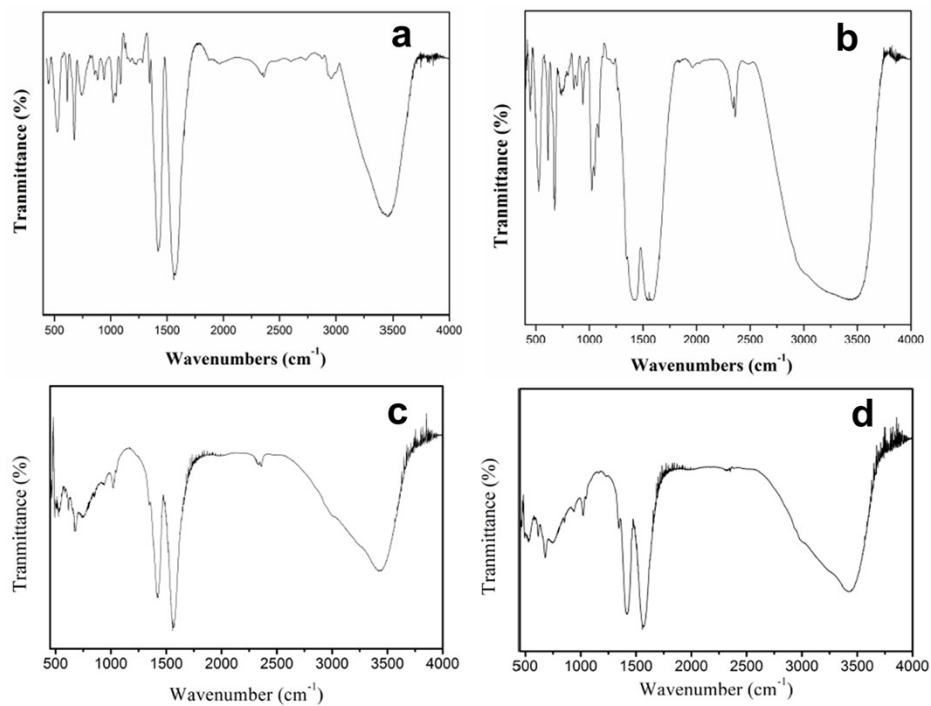

85

86 **Figure S4. IR spectra of M20-7, M20-9, M20-17, M20-20.** IR spectra of (a) M20-7 (Cu-Ni), (b)  
87 M20-9 (Cu-Co), (c) M20-17 (Cu-Ni-Co) and (d) M20-20 (Cu-Ni-Co-Zn-Mn), shows their  
88 resemblance.

89

90

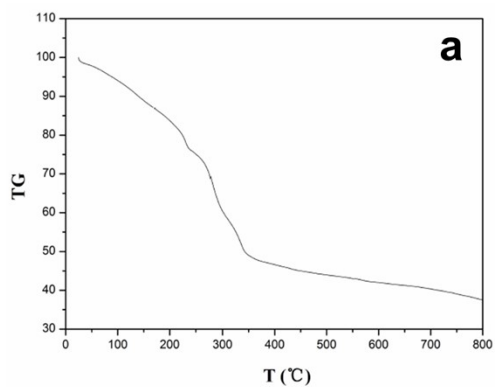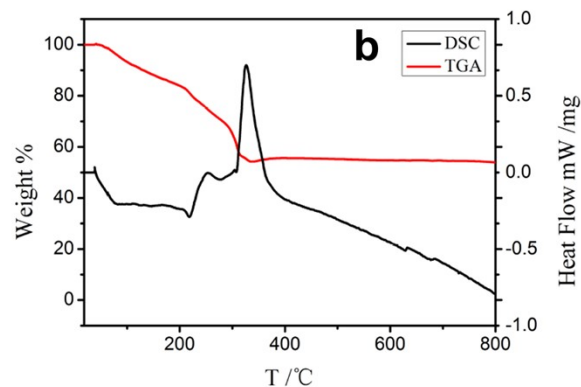

Figure S10. TGA/DSC of M20-17 in N<sub>2</sub> flow.

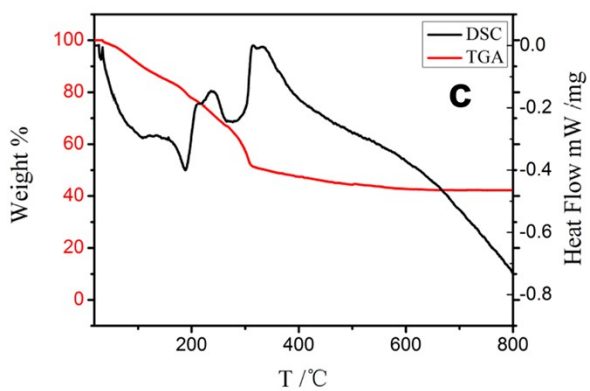

91

92

93 **Figure S5. TGA of M20-7, M20-17, M20-20.** (a) TGA of M20-7 in N<sub>2</sub> flow. (b) TGA/DSC of M20-17

94 in N<sub>2</sub> flow. (c) TGA/DSC of M20-20 in N<sub>2</sub> flow.

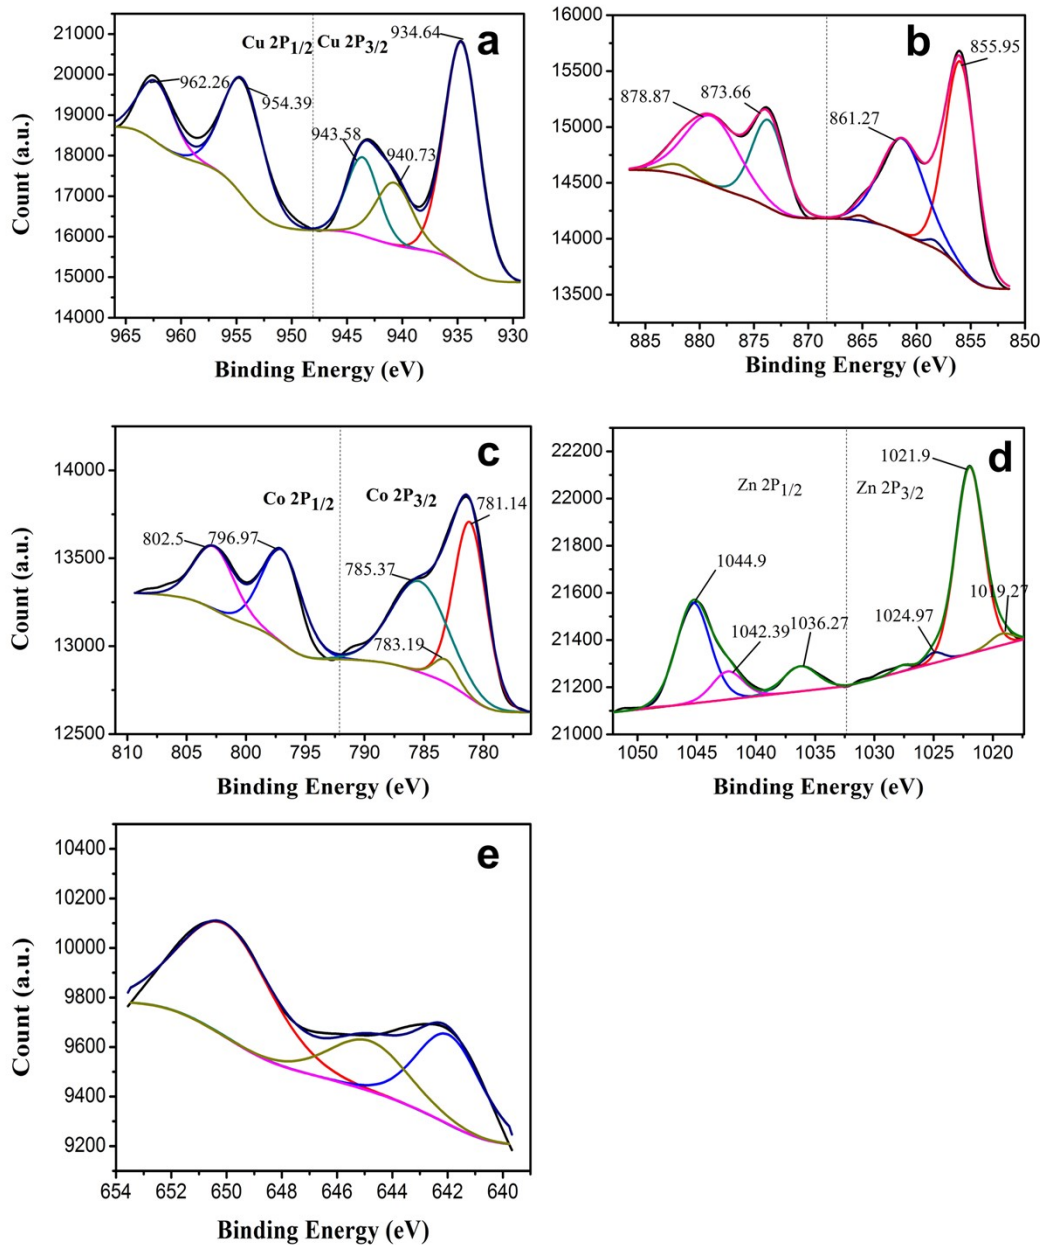

95

96 **Figure S6. The XPS spectra for as-synthesized M20-20.** (a) 934.64 eV is ascribed to Cu 2P<sub>3/2</sub>  
 97 and 954.39 eV is relative to Cu 2P<sub>1/2</sub> of Cu<sup>2+</sup>. (b) Ni 2P<sub>3/2</sub> and Ni 2P<sub>1/2</sub> signals of Ni<sup>2+</sup> are at 856 and  
 98 873 eV, respectively. (c) Co 2P<sub>3/2</sub> and Co 2P<sub>1/2</sub> signals of Co<sup>2+</sup> are at 781.3 and 797.3 eV. (d) The  
 99 peaks at 1021.9 and 1044.27 eV belong to the Zn 2P<sub>3/2</sub> and Zn 2P<sub>1/2</sub> signals of Zn<sup>2+</sup>. (e) The peaks  
 100 at 641.95 and 649.09 eV are ascribed to the Mn 2P<sub>3/2</sub> and Mn 2P<sub>1/2</sub> signals of Mn<sup>2+</sup>, respectively.

101



102

103

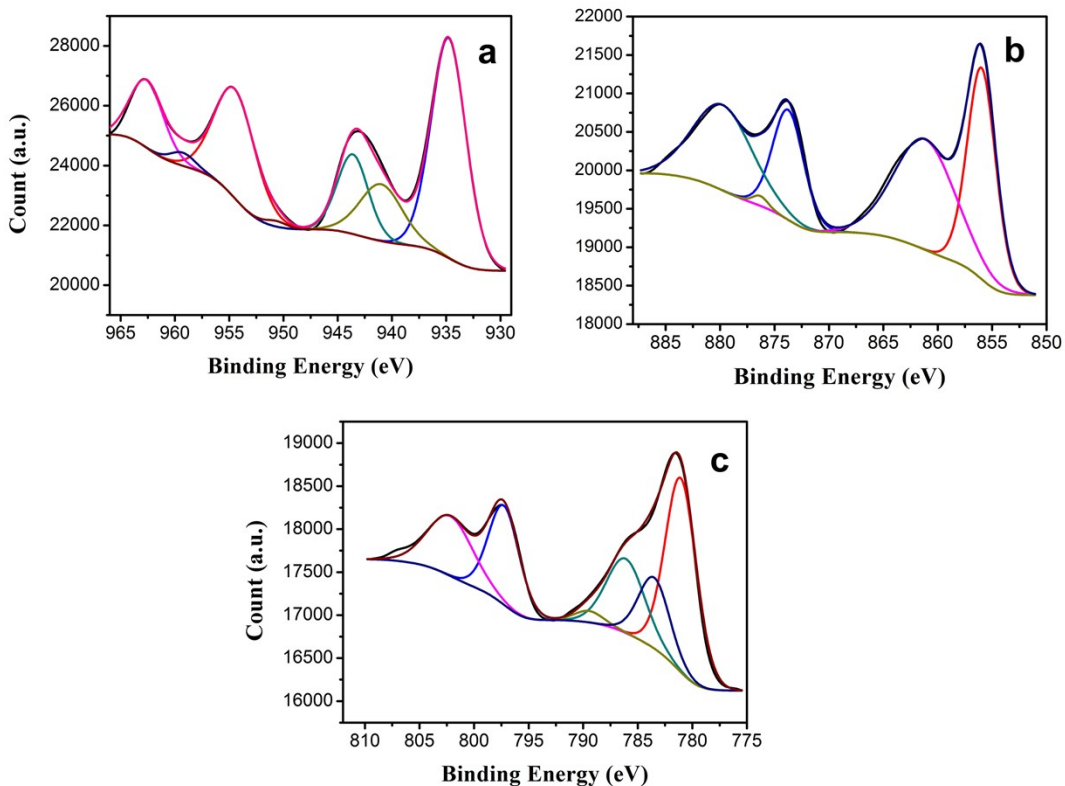

104

105 **Figure S7. The XPS spectra for as-synthesized M20-17.** (a) The peaks at 935 and 954.8 eV are  
106 ascribed to the Cu  $2P_{3/2}$  and Cu  $2P_{1/2}$  of  $\text{Cu}^{2+}$ , respectively. The other peaks located at higher  
107 binding energies (940-945 eV and 954-965 eV) can be attributed to satellite peaks characteristic of  
108  $\text{Cu}^{2+}$ . (b) The peaks at 856 and 873 eV are ascribed to the Ni  $2P_{3/2}$  and Ni  $2P_{1/2}$  signals of  $\text{Ni}^{2+}$   
109 respectively. (c) The peaks at 781.3 and 797.3 eV are ascribed to the Co  $2P_{3/2}$  and Co  $2P_{1/2}$  signals  
110 of  $\text{Co}^{2+}$ , respectively.

111

112

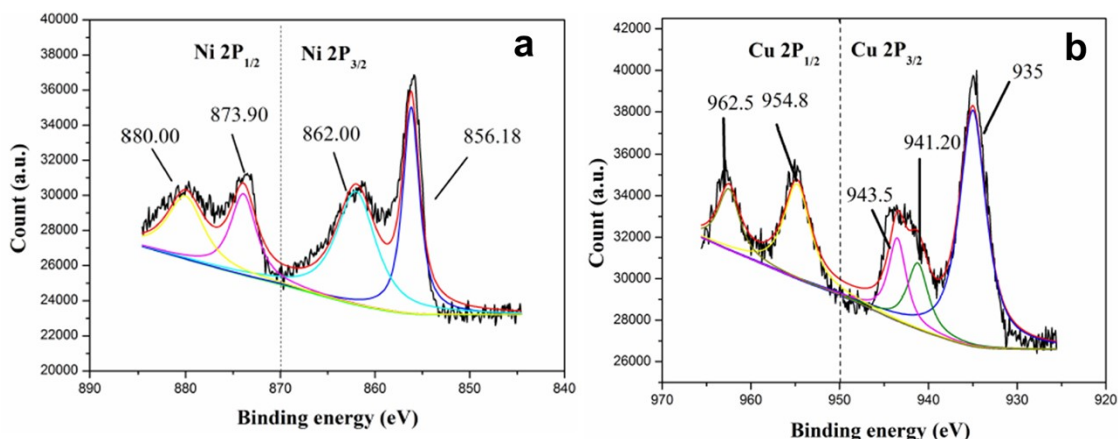

113

114 **Figure S8. The XPS spectra for as-synthesized M20-7.** (a) The peaks at 935 and 954.8 eV are  
 115 ascribed to the Cu 2P<sub>3/2</sub> and Cu 2P<sub>1/2</sub> of Cu<sup>2+</sup>, respectively. The other peaks located at higher  
 116 binding energies (940-945 eV and 954-965 eV) can be attributed to satellite peaks characteristic of  
 117 Cu<sup>2+</sup>. (b) The peaks at 856 and 873 eV are ascribed to the Ni 2P<sub>3/2</sub> and Ni 2P<sub>1/2</sub> signals of Ni<sup>2+</sup>,  
 118 respectively.

119

120

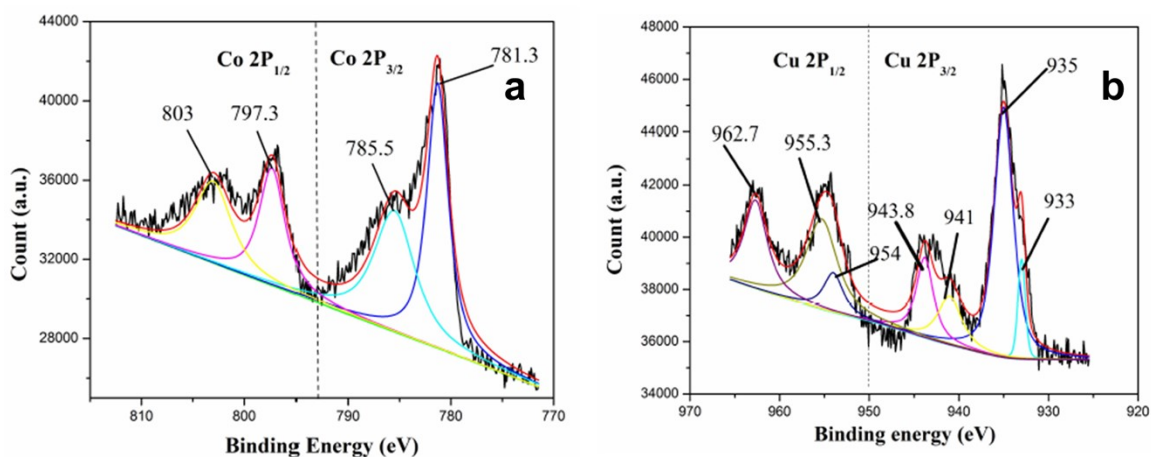

121

122 **Figure S9. The XPS spectra for as-synthesized M20-9.** (a) the peaks at 935 and 955.3 eV are  
 123 ascribed to the Cu 2P<sub>3/2</sub> and Cu 2P<sub>1/2</sub> of Cu<sup>2+</sup>, respectively. The other peaks located at higher  
 124 binding energies (940-945 eV and 954-965 eV) can be attributed to satellite peaks characteristic of  
 125 Cu<sup>2+</sup>. (b) The peaks at 781.3 and 797.3 eV are ascribed to the Co 2P<sub>3/2</sub> and Co 2P<sub>1/2</sub> signals of  
 126 Co<sup>2+</sup>, respectively.

127

128

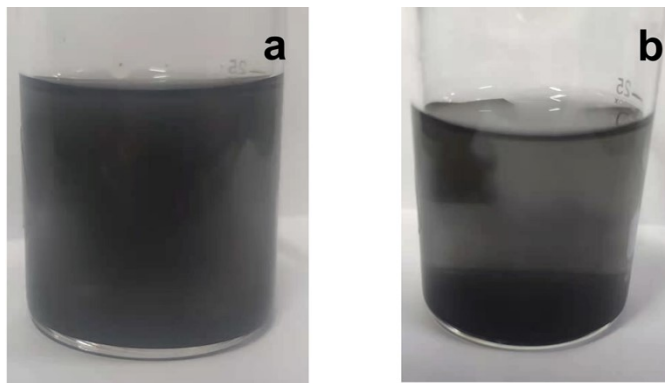

129

130 **Figure S10. Photograph of NCNT mixed with M20-20.** (a) NCNT dispersed in ethanol (b) Mixing  
131 solution after addition of M20-20, the precipitate proving the NCNT and M20-20 combined by  
132 electrostatic force.

133

134

135

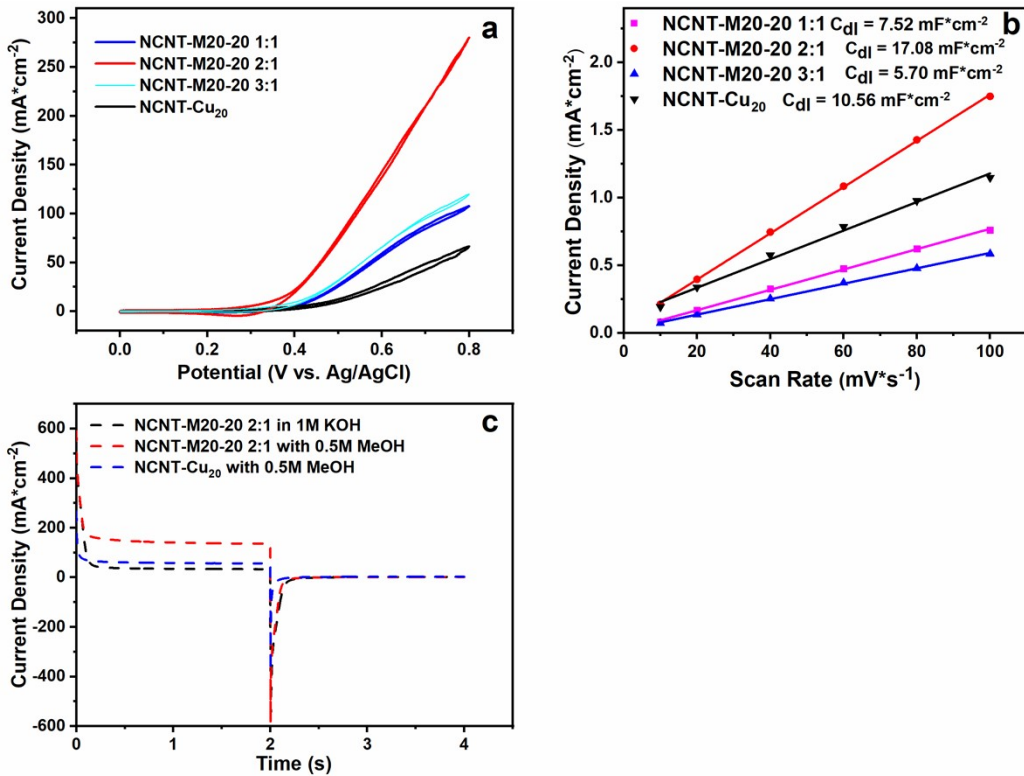

136

137 **Figure S11. Electrooxidation methanol characterization of NCNT-M20-20.** (a) CV comparison  
 138 of all samples in 1 M KOH with 0.5 M methanol. (b) Electric double-layer capacitance comparison  
 139 of all samples. (c) Double-step chronoamperometry analysis of NCNT- $\text{Cu}_{20}$  and NCNT-M20-20 2:1  
 140 in 1M KOH with and without 0.5 M methanol.

141

142

143

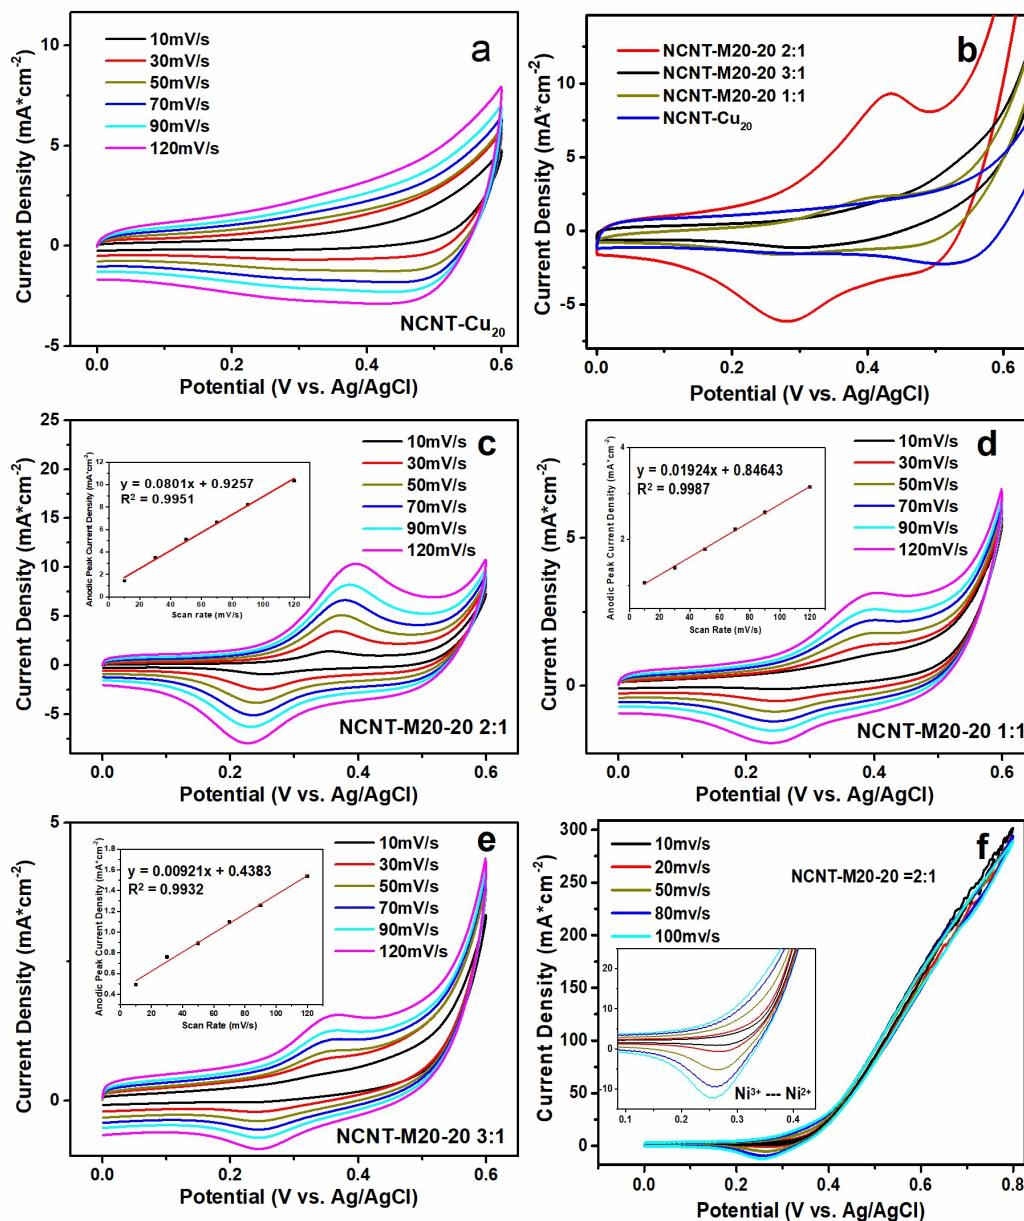

144

145 **Figure S12. Electrochemical behavior analysis of NCNT-M20-20 using CVs with different**  
 146 **scan rates.** (a) CVs of NCNT-Cu<sub>20</sub> in 1 M KOH at different scan rates. (b) All samples' CVs in 1 M  
 147 KOH. (c) CVs of NCNT-M20-20 2:1 in 1 M KOH at different scan rates, the inset graph is the  
 148 linearity of anodic peak current density vs. scan rate. (d) CVs of NCNT-M20-20 1:1 in 1 M KOH at  
 149 different scan rates, the inset graph is the linearity of anodic peak current density vs. scan rate. (e)  
 150 CVs of NCNT-M20-20 3:1 in 1 M KOH at different scan rates, the inset graph is the linearity of

151 anodic peak current density vs. scan rate. (f) CV curves of NCNT-M20-20 2:1 electrode in 1.0 M  
152 KOH + 0.5 M methanol electrolyte at different scan rate, the inset image is partial enlargement of  
153 the curve.

154

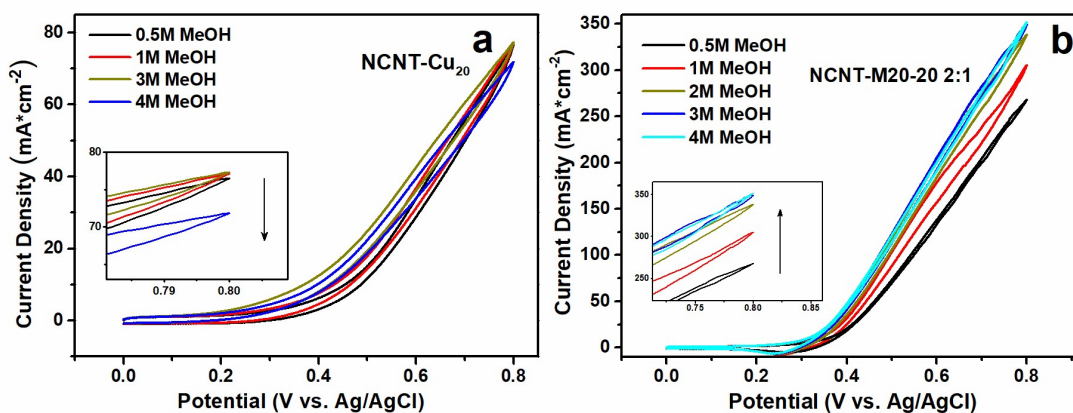

155

156 **Figure S13. High methanol concentration tolerance test.** (a) CV curves of NCNT-Cu<sub>20</sub> and (b)  
157 CVs of NCNT-M20-20 2:1 in 1M KOH with different methanol concentration with magnified view  
158 around 0.8V.

159

160

161

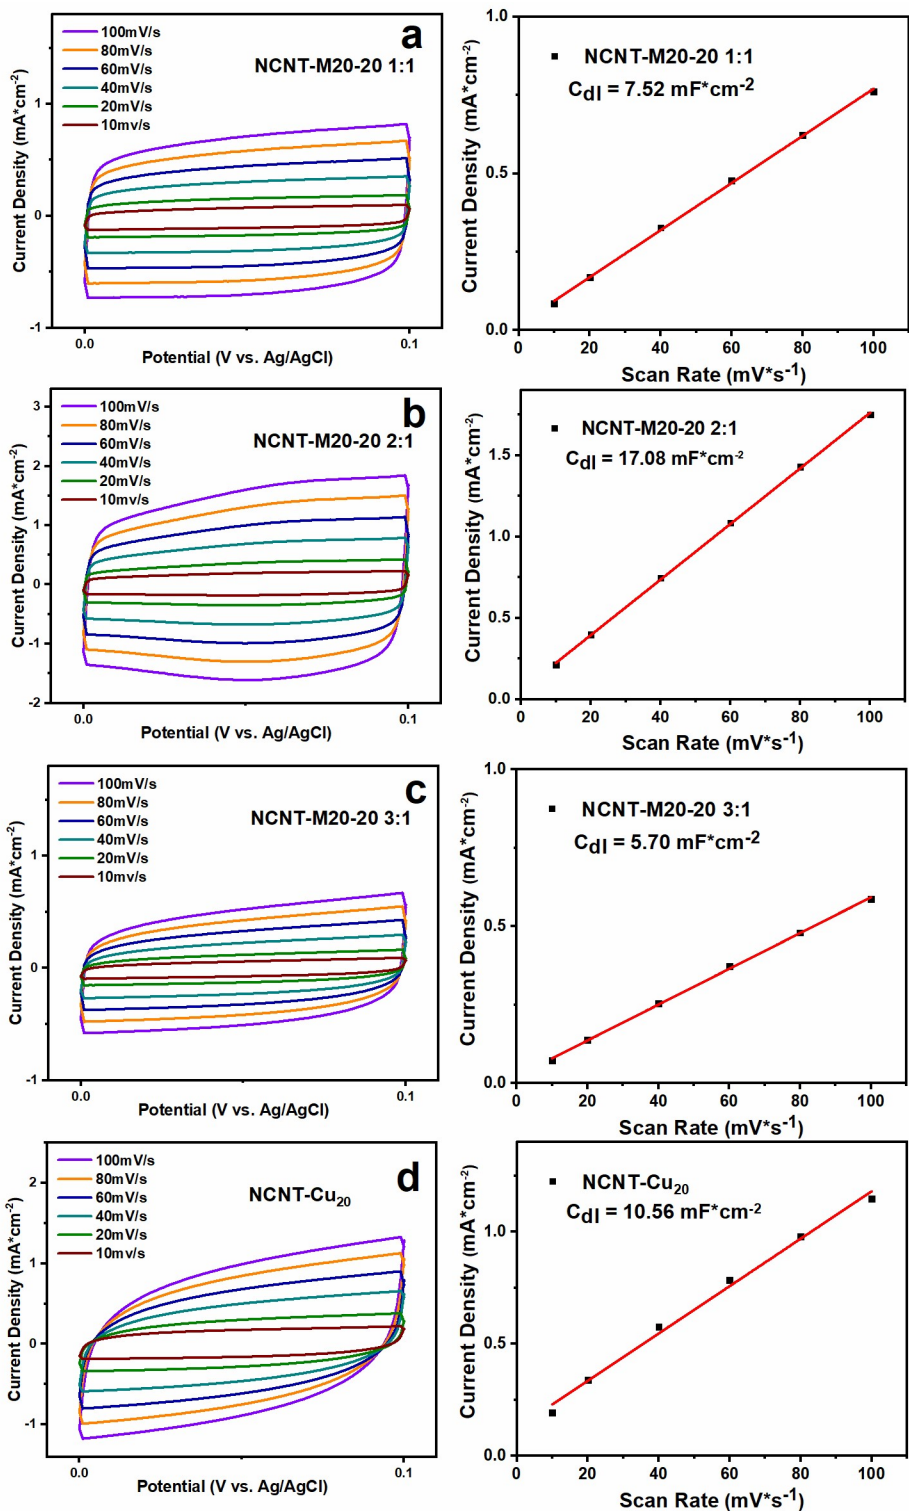

162

163 **Figure S14. Electrochemical active surface area test.** CVs of NCNT-M20-20 1:1(a), 2:1(b),  
 164 3:1(c), and NCNT-Cu<sub>20</sub> (d) tested in 1M KOH at increasingly higher sweep rates: 10, 20, 40, 60,

165 80, 100  $\text{mV s}^{-1}$ . The right side is the linear fitting of the anodic current densities to the scan rates of  
166 each sample.

167

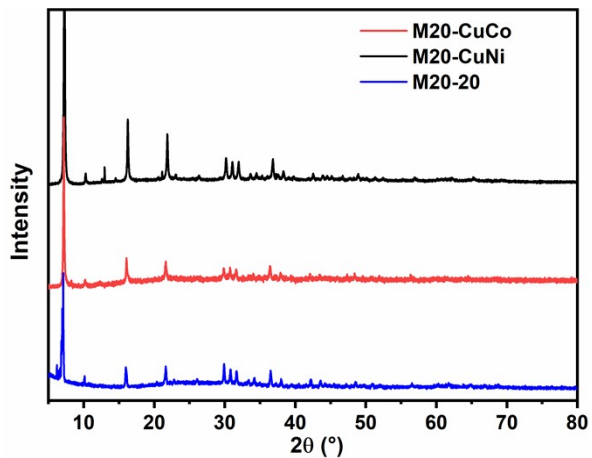

168

169 **Figure S15.** XRD results of M20-CuNi, M20-CuCo and M20-20.

170

171

172

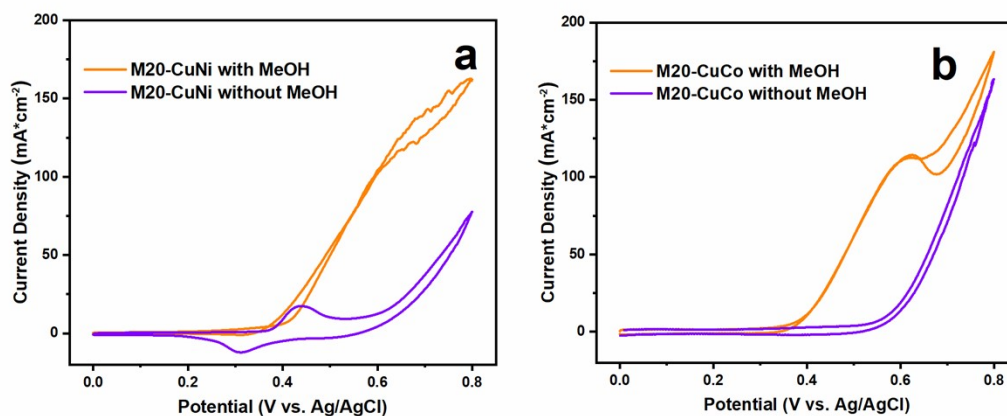

173

174 **Figure S16. (a)** CV comparison of M20-CuNi with and without 0.5M MeOH. **(b)** CV  
175 comparison of M20-CuCo with and without 0.5M MeOH.

176



177

178

179

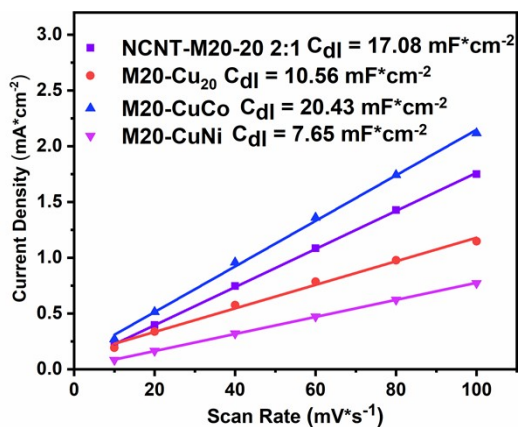

180

181 **Figure S17.** Double layer capacitance comparison of NCNT-M20-20 2:1, M20-Cu<sub>20</sub>, M20-  
182 CuCo, M20-CuNi.

183

184

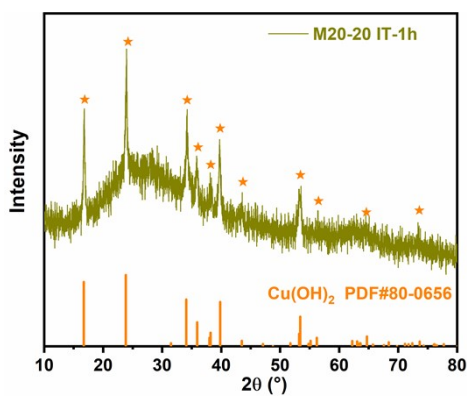

185

186 **Figure S18.** The XRD result of M20-20 after chronoamperometry at 0.7V.

187

188

189

190

191

192

193

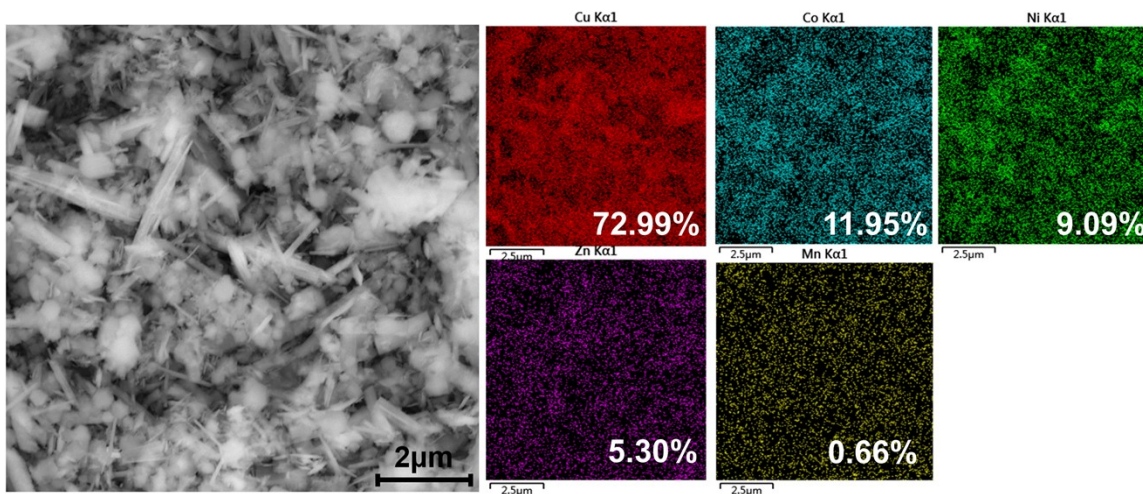

194

195 **Figure S19.** SEM and EDS results of M20-20 after 0.7V, chronoamperometry, metal  
196 element proportion marked left bottom at each element distribution.

197

198

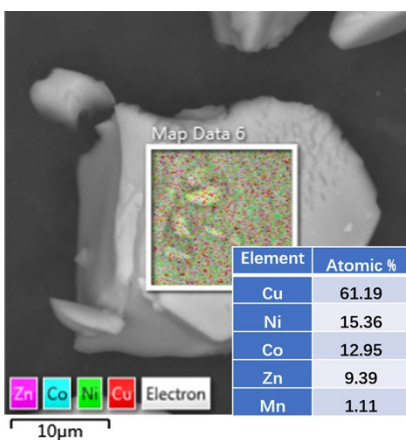

199

200 **Figure S20.** SEM and EDS result of pristine M20-20 bulk with element proportion at

201 bottom right.

202

203

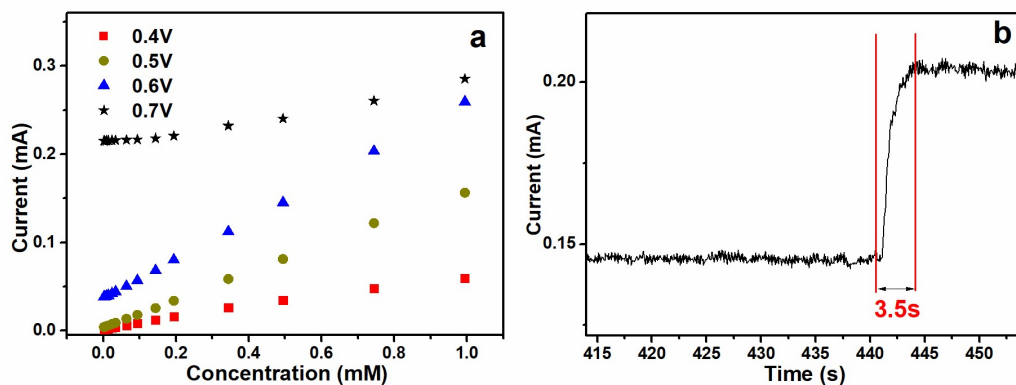

204

205 **Figure S21. Response time test and working potential optimization for glucose detection.**

206 (a) The current–concentration response of NCNT-M20-20 2:1 under different potentials. (b)

207 Amperometric response time for reaching a steady state after glucose injection.

208

209

210

211

212 **Table S1.** Metal composition of the obtained single-crystalline keplerates in {M<sub>20</sub>} library.

| Code   | Metal Composition                                                            | Ratio <sup>[a]</sup> | Amines                  |
|--------|------------------------------------------------------------------------------|----------------------|-------------------------|
| M20-7  | Cu <sub>10.38</sub> Ni <sub>9.62</sub>                                       | 1:1.5                | trimethylamine          |
| M20-9  | Cu <sub>10.77</sub> Co <sub>9.23</sub>                                       | 1:1                  | trimethylamine          |
| M20-10 | Cu <sub>9.80</sub> Co <sub>10.20</sub>                                       | 1:1.5                | trimethylamine          |
| M20-17 | Cu <sub>10.19</sub> Ni <sub>4.91</sub> Co <sub>4.90</sub>                    | 3:2:3                | <i>iso</i> -propylamine |
| M20-19 | Cu <sub>10.57</sub> Ni <sub>5.63</sub> Co <sub>3.13</sub> Zn <sub>0.67</sub> | 1:1:1:1              | trimethylamine          |

|               |                                                                                     |           |                         |
|---------------|-------------------------------------------------------------------------------------|-----------|-------------------------|
| <b>M20-20</b> | $\text{Cu}_{12.87}\text{Ni}_{2.93}\text{Co}_{2.88}\text{Zn}_{1.12}\text{Mn}_{0.18}$ | 6:1:1:1:1 | <i>iso</i> -propylamine |
| <b>M20-21</b> | $\text{Cu}_{9.98}\text{Ni}_{5.16}\text{Co}_{4.35}\text{Zn}_{0.41}\text{Mn}_{0.10}$  | 4:2:2:1:1 | <i>iso</i> -propylamine |
| <b>M20-22</b> | $\text{Cu}_{9.06}\text{Ni}_{4.93}\text{Co}_{5.63}\text{Zn}_{0.23}\text{Mn}_{0.15}$  | 3:2:3:1:1 | <i>iso</i> -propylamine |
| <b>M20-23</b> | $\text{Cu}_{9.37}\text{Ni}_{6.01}\text{Co}_{4.10}\text{Zn}_{0.39}\text{Mn}_{0.13}$  | 2:2:2:2:2 | <i>iso</i> -propylamine |
| <b>M20-24</b> | $\text{Cu}_{11.55}\text{Ni}_{3.91}\text{Co}_{3.39}\text{Zn}_{0.74}\text{Mn}_{0.44}$ | 6:1:1:1:1 | trimethylamine          |
| <b>M20-25</b> | $\text{Cu}_{10.16}\text{Ni}_{5.12}\text{Co}_{3.98}\text{Zn}_{0.26}\text{Mn}_{0.48}$ | 4:2:2:1:1 | trimethylamine          |
| <b>M20-26</b> | $\text{Cu}_{9.68}\text{Ni}_{4.45}\text{Co}_{5.19}\text{Zn}_{0.20}\text{Mn}_{0.48}$  | 3:2:3:1:1 | trimethylamine          |

213

<sup>a</sup> Ratio of each metal acetate (mmol) in a 20 mL reaction mixture.

**Table S2.** Synthetic results of {M<sub>20</sub>} keplerates with different starting metal salts combinations and amines

| Metal Combination |       | Result Products with Different Amine and Precursor Ratio |                                        |                                                           |                                         |                                                              |                                                               |                                                  |                                                           |  |  |
|-------------------|-------|----------------------------------------------------------|----------------------------------------|-----------------------------------------------------------|-----------------------------------------|--------------------------------------------------------------|---------------------------------------------------------------|--------------------------------------------------|-----------------------------------------------------------|--|--|
| Cu                |       | {Cu <sub>20</sub> }                                      |                                        |                                                           |                                         |                                                              |                                                               |                                                  |                                                           |  |  |
|                   | Cu-Zn | 3.1:3.1                                                  |                                        |                                                           |                                         |                                                              |                                                               |                                                  |                                                           |  |  |
| Cu-Ni             |       | 2:1                                                      |                                        | 1:1                                                       |                                         | 1:1.5                                                        |                                                               | 1:2                                              |                                                           |  |  |
|                   |       | Cu <sub>12.59</sub> Ni <sub>7.41</sub>                   | Cu <sub>12.37</sub> Ni <sub>7.64</sub> | Cu <sub>10.23</sub> Ni <sub>9.77</sub>                    | Cu <sub>10.49</sub> Ni <sub>9.51</sub>  | Cu <sub>8.70</sub> Ni <sub>11.30</sub>                       | Cu <sub>10.38</sub> Ni <sub>9.62</sub>                        | Cu <sub>9.01</sub> Ni <sub>10.99</sub>           | Cu <sub>9.99</sub> Ni <sub>10.01</sub>                    |  |  |
| Cu-Co             |       | 2:1                                                      |                                        | 1:1                                                       |                                         | 1:1.5                                                        |                                                               | 1:2                                              |                                                           |  |  |
|                   |       | x                                                        | x                                      | x                                                         | Cu <sub>10.77</sub> Co <sub>10.23</sub> | x                                                            | Cu <sub>9.8</sub> Co <sub>10.2</sub>                          | x                                                | Cu <sub>9.41</sub> Co <sub>10.59</sub>                    |  |  |
| Cu-Ni-Zn          |       | 5:2:2                                                    |                                        | 4:2:2                                                     |                                         | 3:3:2                                                        |                                                               | 3:3:3                                            |                                                           |  |  |
|                   |       | x                                                        | x                                      | x                                                         | x                                       | x                                                            | Cu <sub>11.29</sub> Ni <sub>8.02</sub> Zn <sub>0.69</sub>     | x                                                | Cu <sub>10.13</sub> Ni <sub>8.77</sub> Zn <sub>1.10</sub> |  |  |
| Cu-Co-Zn          |       | 5:2:2                                                    |                                        | 4:2:2                                                     |                                         | 3:3:2                                                        |                                                               | 3:3:3                                            |                                                           |  |  |
|                   |       | x                                                        | x                                      | x                                                         | x                                       | x                                                            | Cu <sub>10.49</sub> Co <sub>8.76</sub> Zn <sub>0.7</sub><br>5 | x                                                | Cu <sub>10.67</sub> Co <sub>8.14</sub> Zn <sub>1.19</sub> |  |  |
| Cu-Ni-Co          |       | 5:2:2                                                    |                                        | 4:2:2                                                     |                                         | 3:3:2                                                        |                                                               | 3:3:3                                            |                                                           |  |  |
|                   |       | x                                                        | x                                      | Cu <sub>11.21</sub> Ni <sub>5.31</sub> Co <sub>3.48</sub> | -                                       | Cu <sub>10.20</sub> Ni <sub>4.91</sub> Co <sub>4</sub><br>90 | -                                                             | Cu <sub>9.89</sub> Ni <sub>6.25</sub> C<br>03.86 | -                                                         |  |  |
| Cu-Ni-Co-Zn       |       | 1:1:1:1                                                  |                                        | 3:3:2:2/4:2:2:2/6:1:1:1/2:2:2:2/2.5:2.5:2.5:2.5           |                                         |                                                              |                                                               |                                                  |                                                           |  |  |

|  |                       |                                                                                     |                                                                                    |                                                                                    |                                                                                     |                                                                                   |                                                                                    |                                                                                    |           |
|--|-----------------------|-------------------------------------------------------------------------------------|------------------------------------------------------------------------------------|------------------------------------------------------------------------------------|-------------------------------------------------------------------------------------|-----------------------------------------------------------------------------------|------------------------------------------------------------------------------------|------------------------------------------------------------------------------------|-----------|
|  |                       | x                                                                                   | $\text{Cu}_{10.57}\text{Ni}_{5.63}\text{C}_{0.14}\text{Zn}_{0.67}$                 | x                                                                                  |                                                                                     |                                                                                   |                                                                                    |                                                                                    |           |
|  |                       | 6:1:1:1:1                                                                           |                                                                                    | 4:2:2:1:1                                                                          |                                                                                     | 3:3:2:1:1                                                                         |                                                                                    | 2:2:2:2:2                                                                          |           |
|  | <b>Cu-Ni-Co-Zn-Mn</b> | $\text{Cu}_{12.89}\text{Ni}_{2.93}\text{Co}_{2.88}\text{Zn}_{1.12}\text{Mn}_{0.18}$ | $\text{Cu}_{11.55}\text{Ni}_{3.91}\text{C}_{0.39}\text{Zn}_{0.74}\text{Mn}_{0.44}$ | $\text{Cu}_{9.98}\text{Ni}_{5.16}\text{Co}_{4.35}\text{Zn}_{0.41}\text{Mn}_{0.10}$ | $\text{Cu}_{10.6}\text{Ni}_{5.12}\text{Co}_3_{.98}\text{Zn}_{0.26}\text{Mn}_{0.48}$ | $\text{Cu}_{9.06}\text{Ni}_{4.93}\text{Co}_{5.6}\text{Zn}_{0.23}\text{Mn}_{0.15}$ | $\text{Cu}_{9.68}\text{Ni}_{4.45}\text{Co}_{5.19}\text{Zn}_{0.20}\text{Mn}_{0.48}$ | $\text{Cu}_{9.37}\text{Ni}_{6.01}\text{Co}_{4.10}\text{Zn}_{0.39}\text{Mn}_{0.13}$ | x         |
|  | <b>Amine</b>          | <b>A1</b>                                                                           | <b>A2</b>                                                                          | <b>A1</b>                                                                          | <b>A2</b>                                                                           | <b>A1</b>                                                                         | <b>A2</b>                                                                          | <b>A1</b>                                                                          | <b>A2</b> |

<sup>a</sup> A1: *iso*-propylamine, A2: trimethylamine

<sup>b</sup> x: Failed to obtain single crystals

<sup>c</sup> -: Not yet tried

214

**Table S3:** ICP results of **M20-24** obtained in different batches.

| <b>M20-24</b>             |                                             |
|---------------------------|---------------------------------------------|
| 11.55:3.91:3.39:0.74:0.44 | 1 <sup>st</sup> : 11.62:3.79:3.30:0.86:0.43 |
|                           | 2 <sup>nd</sup> : 11.69:3.82:3.37:0.63:0.49 |
|                           | 3 <sup>rd</sup> : 11.34:4.11:3.43:0.73:0.39 |

215

216

217

**Table S4.** ICP results of crystal samples from using equivalent amounts of starting metal salts.

| Code          | Ratio of starting metal acetates <sup>a</sup> | Ratio of metal number in {M <sub>20</sub> } clusters                                            | Conclusion from the ICP results |
|---------------|-----------------------------------------------|-------------------------------------------------------------------------------------------------|---------------------------------|
| <b>M20-9</b>  | <b>1:1</b>                                    | Cu <sub>10.77</sub> Co <sub>9.23</sub>                                                          | Cu > Co                         |
| <b>M20-17</b> | <b>3:2:3</b>                                  | Cu <sub>10.19</sub> Ni <sub>4.91</sub> Co <sub>4.90</sub>                                       | Cu > Co                         |
| <b>M20-19</b> | <b>1:1:1:1</b>                                | Cu <sub>10.57</sub> Ni <sub>5.63</sub> Co <sub>3.13</sub> Zn <sub>0.67</sub>                    | Zn < Cu > Ni > Co               |
| <b>M20-20</b> | <b>6:1:1:1:1</b>                              | Cu <sub>12.87</sub> Ni <sub>2.93</sub> Co <sub>2.88</sub> Zn <sub>1.12</sub> Mn <sub>0.18</sub> | Ni > Co > Mn                    |
| <b>M20-21</b> | <b>4:2:2:1:1</b>                              | Cu <sub>9.98</sub> Ni <sub>5.16</sub> Co <sub>4.35</sub> Zn <sub>0.41</sub> Mn <sub>0.10</sub>  | Ni > Co                         |
| <b>M20-22</b> | <b>3:2:3:1:1</b>                              | Cu <sub>9.06</sub> Ni <sub>4.93</sub> Co <sub>5.63</sub> Zn <sub>0.23</sub> Mn <sub>0.15</sub>  | Cu > Co                         |
| <b>M20-23</b> | <b>2:2:2:2:2</b>                              | Cu <sub>9.37</sub> Ni <sub>6.01</sub> Co <sub>4.10</sub> Zn <sub>0.39</sub> Mn <sub>0.13</sub>  | Mn < Co < Ni < Cu > Zn          |
| <b>M20-24</b> | <b>6:1:1:1:1</b>                              | Cu <sub>11.55</sub> Ni <sub>3.91</sub> Co <sub>3.39</sub> Zn <sub>0.74</sub> Mn <sub>0.44</sub> | Ni > Co > Mn                    |
| <b>M20-25</b> | <b>4:2:2:1:1</b>                              | Cu <sub>10.16</sub> Ni <sub>5.12</sub> Co <sub>3.98</sub> Zn <sub>0.26</sub> Mn <sub>0.48</sub> | Ni > Co                         |
| <b>M20-26</b> | <b>3:2:3:1:1</b>                              | Cu <sub>9.68</sub> Ni <sub>4.45</sub> Co <sub>5.19</sub> Zn <sub>0.20</sub> Mn <sub>0.48</sub>  | Cu > Co                         |

219

220 <sup>a</sup>The bold number in “Ratio of starting metal acetates” column means the equal ratio of starting  
 221 salts. They are help to compare the cooperation ability of metal elements within the clusters.

222

223

224

225

226

227

228

229 **X-Ray Crystallographic Analysis**

230 Single-crystal X-ray analyses were performed on a Siemens SMART platform diffractometer

231 outfitted with an Apex II area detector and monochromatized Mo<sub>K $\alpha$</sub>  radiation ( $\lambda = 0.71073 \text{ \AA}$ ).232 Structures were solved by direct methods and refined using the *SHELXTL* software package.<sup>1</sup>

233

234 **Table S5.** Crystallographic data and structure refinement for **M20-7**, **M20-17** and **M20-24**

|                            | <b>M20-7</b>                                                                              | <b>M20-17</b>                                                                                            | <b>M20-24</b>                                                                                                                                      |
|----------------------------|-------------------------------------------------------------------------------------------|----------------------------------------------------------------------------------------------------------|----------------------------------------------------------------------------------------------------------------------------------------------------|
| empirical formula          | C <sub>31</sub> H <sub>94</sub> Cu <sub>10.20</sub><br>Ni <sub>9.80</sub> O <sub>69</sub> | C <sub>31</sub> H <sub>94</sub> Co <sub>4.90</sub> Cu <sub>10.2</sub> Ni <sub>4.90</sub> O <sub>69</sub> | C <sub>31</sub> H <sub>93</sub> Cu <sub>11.31</sub> Co <sub>3.45</sub><br>Mn <sub>0.39</sub> Ni <sub>4.15</sub> Zn <sub>0.69</sub> O <sub>69</sub> |
| fw (g)                     | 2794.53                                                                                   | 2795.61                                                                                                  | 2802.47                                                                                                                                            |
| <i>T</i> (K)               | 173 K                                                                                     | 173 K                                                                                                    | 173 K                                                                                                                                              |
| cryst syst                 | cubic                                                                                     | cubic                                                                                                    | cubic                                                                                                                                              |
| space group                | Im-3m                                                                                     | Im-3m                                                                                                    | Im-3m                                                                                                                                              |
| <i>a</i> (Å)               | 17.1976(4)                                                                                | 17.2801                                                                                                  | 17.2463(2)                                                                                                                                         |
| <i>b</i> (Å)               | 17.1976(4)                                                                                | 17.2801                                                                                                  | 17.2463(2)                                                                                                                                         |
| <i>c</i> (Å)               | 17.1976(4)                                                                                | 17.2801                                                                                                  | 17.2463(2)                                                                                                                                         |
| <i>A</i> (deg)             | 90                                                                                        | 90                                                                                                       | 90                                                                                                                                                 |
| $\beta$ (deg)              | 90                                                                                        | 90                                                                                                       | 90                                                                                                                                                 |
| $\gamma$ (deg)             | 90                                                                                        | 90                                                                                                       | 90                                                                                                                                                 |
| <i>V</i> (Å <sup>3</sup> ) | 5086.3(2)                                                                                 | 5159.87(10)                                                                                              | 5129.65(10)                                                                                                                                        |



| Z                                   | 2                                | 2                                | 2                                |
|-------------------------------------|----------------------------------|----------------------------------|----------------------------------|
| Dcalcd (g cm <sup>-3</sup> )        | 1.825                            | 1.799                            | 1.814                            |
| $\mu$ (mm <sup>-1</sup> )           | 3.943                            | 3.781                            | 3.871                            |
| F(000)                              | 2804                             | 2795                             | 2798                             |
| <i>R</i> (>2 $\sigma$ ( <i>I</i> )) | <i>R</i> <sub>1</sub> = 0.1166   | <i>R</i> <sub>1</sub> = 0.0738   | <i>R</i> <sub>1</sub> = 0.0845   |
|                                     | w <i>R</i> <sub>2</sub> = 0.2788 | w <i>R</i> <sub>2</sub> = 0.2632 | w <i>R</i> <sub>2</sub> = 0.2752 |
| GOF                                 | 1.403                            | 1.105                            | 1.079                            |

235

236

237

238

239

240

241

242

243

244

245

246

247

248

249

250

251

252

253

254

**Table S6.** MOR performance comparison with pervious works

| <b>Catalysts</b>                          | <b>Electrolyte Concentration (M)</b> | <b>Scan rate (mV s<sup>-1</sup>)</b> | <b>Activity at 0.75 V vs. Ag/AgCl(3.5 M KCl) (mA·cm<sup>-2</sup>)</b> | <b>Other potential and corresponding current density</b> | <b>Ref .</b> |
|-------------------------------------------|--------------------------------------|--------------------------------------|-----------------------------------------------------------------------|----------------------------------------------------------|--------------|
| 2Cu@CoOx-CLs                              | CH <sub>3</sub> OH: 0.5<br>KOH: 1    | 50                                   | 108.25                                                                | -                                                        | 2            |
| Ni <sub>0.75</sub> Cu <sub>0.25</sub>     | CH <sub>3</sub> OH: 0.5<br>NaOH: 1   | 50                                   | 116.75                                                                | -                                                        | 3            |
| Cu/N-C monolith                           | CH <sub>3</sub> OH: 0.5<br>KOH: 1    | -                                    | -                                                                     | 59.61mA·cm <sup>-2</sup> at 0.569V                       | 4            |
| Cu–Ni NWs                                 | CH <sub>3</sub> OH: 0.5<br>NaOH: 1   | 50                                   | 133.19                                                                | -                                                        | 5            |
| CuO/Co(OH) <sub>2</sub> Nanosheets        | CH <sub>3</sub> OH: 3<br>KOH: 1      | 50                                   | -                                                                     | 142mA·cm <sup>-2</sup> at 0.60V                          | 6            |
| Cu/NiCu NWs                               | CH <sub>3</sub> OH: 1<br>KOH: 1      | 50                                   | -                                                                     | 33.33mA·cm <sup>-2</sup> at 0.51V                        | 7            |
| CuO-NS                                    | CH <sub>3</sub> OH: 1<br>NaOH: 0.5   | 50                                   | 1.48                                                                  | -                                                        | 8            |
| CuO/Cu(OH) <sub>2</sub> Nanoneedles       | CH <sub>3</sub> OH: 0.5<br>KOH: 1    | 5                                    | -                                                                     | 120.91mA·cm <sup>-2</sup> at 0.66V                       | 9            |
| Cu(OH) <sub>2</sub> –CuO Nanoneedle Array | CH <sub>3</sub> OH: 0.5<br>KOH: 1    | 10                                   | -                                                                     | 60.3mA·cm <sup>-2</sup> at 0.58V                         | 10           |
| Ni-Co                                     | CH <sub>3</sub> OH: 0.5<br>KOH: 1    | 50                                   | -                                                                     | 36.42mA·cm <sup>-2</sup> at 0.6V                         | 11           |

|                                              |                                    |    |        |                                      |    |
|----------------------------------------------|------------------------------------|----|--------|--------------------------------------|----|
| NiCo <sub>2</sub> O <sub>4</sub> /rGO        | CH <sub>3</sub> OH: 0.5<br>NaOH: 1 | 50 | -      | 5.23mA·cm <sup>-2</sup> at<br>0.5V   | 12 |
| Ni@3DHPG                                     | CH <sub>3</sub> OH: 0.5<br>KOH: 1  | 50 | -      | 144.92mA·cm <sup>-2</sup> at<br>0.7V | 13 |
| Ni-NPs/ZrO <sub>2</sub> -<br>PCs             | CH <sub>3</sub> OH: 0.5<br>KOH: 1  | 50 | -      | 117.57mA·cm <sup>-2</sup> at<br>0.6V | 14 |
| 5CeO <sub>2</sub> -NiO                       | CH <sub>3</sub> OH: 1<br>KOH: 1    | 50 | 110.91 |                                      | 15 |
| ZnCo <sub>2</sub> O <sub>4</sub> /Ni<br>foam | CH <sub>3</sub> OH: 0.5<br>KOH: 1  | 50 | -      | 114.72mA·cm <sup>-2</sup> at<br>0.6V | 16 |
| This work                                    | CH <sub>3</sub> OH: 0.5<br>KOH: 1  | 50 | 179.65 | 123.83mA·cm <sup>-2</sup> at<br>0.6V |    |

255 <sup>a</sup>The potential of SCE or other reference electrodes are all transferred to Ag/AgCl according to  
256 SHE for easy comparison. The current density of methanol oxidation activity is obtained by  
257 using total current subtracting baseline current of OER in all data.

258

### 259 **NoteS1: The Description of IR spectroscopy and TGA results**

260 For the M20-20, the peaks at 681.9 cm<sup>-1</sup>, 530 cm<sup>-1</sup> and 1020 cm<sup>-1</sup> attributed to the vibration  
261 of M-O (M: Cu, Ni, Co, Zn, Mn). Two peaks at 1413.8 cm<sup>-1</sup> and 1570.1 cm<sup>-1</sup> are the characteristic  
262 peak of methanol and acetonitrile. There is a board peak at around 3400-3500 cm<sup>-1</sup> which  
263 origins from the vibration of coordination water molecules and oxhydril group inside the crystal.  
264 From the spectra, it can be clearly seen the similarity of M20-7/M20-9, M20-17/M20-20. Figure  
265 S5 is the thermal gravimetric analysis (TGA) results of three samples. For M20-20, showed in  
266 Figure S5c the existence of the coordination water molecules was proved by the rapid weight  
267 decreasing between 20-180°C., which is caused by the loss of coordination water molecules  
268 and acetate ions. The second weight loss step at 180-350°C assigned to the decomposition of  
269 ligands and oxhydril group. After 350°C, a slow weight loss shows the formation of metal or  
270 metal oxide. The M20-7 and M20-17 (Figure S5a and b) own a similar pattern to M20-20 again  
271 verifying the structure resemblance.

272

273

### 274 **NoteS2: Confirm of the Current Origin of NCNT-M20-20 2:1**

275 Double-step chronoamperometry method was chosen to confirm the current density origin.  
276 As shown in Figure S11c, by switching potential from +0.6 V to +0.1 V (vs. Ag/AgCl) in a solution  
277 of 1 M KOH, no distinct reaction occurred (black line) for NCNT-M20-20 2:1 except limited OER  
278 process. However, when methanol was added (red line) the current density had a significant  
279 rise at +0.6 V but disappeared when switched back to +0.1 V, which strongly proves the origin  
280 of the current is from methanol oxidation compared to the blank one. The NCNT-Cu<sub>20</sub> also  
281 showed a weak current response to methanol (blue line).

282

### 283 **NoteS3: Surface Coverage Species Calculation**

284 The surface coverage of Ni<sup>2+</sup>-Ni<sup>3+</sup> can be evaluated based on the equation below<sup>17</sup>:

$$285 \quad I_p = \left( \frac{n^2 F^2}{4RT} \right) \nu A \Gamma^*$$

286 Where  $I_p$ ,  $F$ ,  $R$ ,  $T$ ,  $\nu$ ,  $A$ ,  $\Gamma^*$  represent peak current, the number of transferred electron ( $n=1$ ),  
287 the general gas constant ( $8.314 \text{ J}\cdot\text{K}^{-1}\cdot\text{mol}^{-1}$ ), the temperature (298K), the scan rate (50 mV/s),  
288 the geometric area of glass carbon electrode ( $0.0706 \text{ cm}^2$ ), and surface coverage of the redox  
289 species. The linear relation of current density and scan rate is demonstrated in the inset graph  
290 of Figure.S12 (c), (d) and (e). The calculated Ni<sup>3+</sup>  $\Gamma^*$  of NCNT-M20-20 1:1, NCNT-M20-20 2:1,  
291 NCNT-M20-20 3:1 are  $2.877 \times 10^{-7} \text{ mol}\cdot\text{cm}^{-2}$ ,  $1.197 \times 10^{-6} \text{ mol}\cdot\text{cm}^{-2}$ ,  $1.377 \times 10^{-7} \text{ mol}\cdot\text{cm}^{-2}$   
292 respectively.

293

### 294 **NoteS4: CV Test to Understand Electrochemical Species Behavior**

295 As shown in Figure S12b for NCNT-M20-20 2:1 in the forward scan, the wide peak at about  
296 +0.35 V (vs. Ag/AgCl) can be the signal of Ni<sup>2+</sup>-Ni<sup>3+</sup> redox couple. After +0.5 V there is a rapid  
297 current rise because of the severe water oxidation. In the backward scan, the wide peak at  
298 +0.25 V should be attributed to the reduction process of Ni<sup>3+</sup>. And there is a board reduction  
299 peak around +0.5 V resulting from Cu<sup>2+</sup>--Cu<sup>3+</sup> redox couple which drifts to the negative side  
300 compared with NCNT-Cu<sub>20</sub>. The shift may be attributed to the remaining elements consisted of  
301 M20-20 changed the chemical environment of Cu element. For NCNT-Cu<sub>20</sub>, as the single metal  
302 component material, there is only a board reduction peak around +0.55 V owing to the Cu<sup>2+</sup>--  
303 Cu<sup>3+</sup> redox couple.<sup>18</sup>

304 For the CV tests of NCNT-M20-20 2:1 and 1:1 and 3:1 at different scan rates (Figure S12c,  
305 d, e), the anodic peaks shift to the positive side and cathodic peaks move to the negative with  
306 increasing of the scan rate. Figure S14d and e show a similar pattern with Figure S14c. NCNT-  
307 Cu<sub>20</sub> (Figure S12a) won't be discussed because no Ni element in the compound but still has a  
308 similar trend. This phenomenon can be assigned to slow reaction kinetics resulted from the  
309 longer conversion time of Ni<sup>3+</sup>-Ni<sup>2+</sup> redox. The inset graphs in Figure S12c, d, e are the plot of

310 the anodic current density as the function of scan rate revealing a good linear correlation, which  
311 demonstrates that the conversion of Ni<sup>2+</sup>-Ni<sup>3+</sup> in KOH is a surface-controlled process.

312 The methanol electrooxidation is a kinetically controlled gas evolution reaction that the kinetic  
313 current won't change with scan rate,<sup>18</sup> as shown in Figure S12f with increasing scan rate the  
314 oxidation current changed inappreciably. Oppositely in the inset graph, a reduction peak is  
315 observed that the current density changed distinctly along with the scan rate. The reduction  
316 peak is attributed to Ni<sup>2+</sup>-Ni<sup>3+</sup> redox, in line with the former conclusion that conversion of Ni<sup>2+</sup>-  
317 Ni<sup>3+</sup> is a surface-controlled process drawn from Figure S14c.

318

### 319 **NoteS5: The Electrochemical Active Surface Area and High Methanol Concentration** 320 **Tolerance**

321 Electrochemical active surface area (ECSA) is another index to evaluate electrochemical  
322 performance. The ECSA was obtained through a non-faraday section CV measurement at scan  
323 rate from 10 to 100 mV s<sup>-1</sup> between 0 to +0.1 V (vs Ag/AgCl) as demonstrated in Figure S14.  
324 The results were calculated according to the equation: ECSA = C<sub>dl</sub>/C<sub>s</sub>, where C<sub>dl</sub> represents  
325 electric double layer capacitance, C<sub>s</sub> is the specific capacitance of 1 cm<sup>2</sup> atomically smooth  
326 standard electrode (here C<sub>s</sub> = 0.04 mF·cm<sup>-2</sup>).<sup>19</sup> C<sub>dl</sub> of all tested subjects are shown in  
327 Figure.S11(b). The ECSA of NCNT-M20-20 2:1 is 427.00 cm<sup>2</sup> which is the highest among  
328 others where NCNT-M20-20 1:1, NCNT-M20-20 3:1, NCNT-Cu<sub>20</sub> are 188.00, 142.50, 264.00  
329 cm<sup>2</sup> respectively. Besides, NCNT-Cu<sub>20</sub> has a similar ECSA with NCNT-M20-20 2:1 but with a  
330 poor performance, which hints the multicomponent played a vital rule in the MOR.

331

332 Catalyst performance in high concentration of methanol is an essential parameter for DMFC  
333 and practical pollutant removal. The property at high concentration was tested with the  
334 methanol concentration from 0.5-4 M (Figure S13a, b). The current density of NCNT-Cu<sub>20</sub> keeps  
335 rising from 0.5 to 3 M, but a sudden fall at 4 M, shows in inset graph. For NCNT-M20-20 2:1  
336 the current density keeps rising till as high as 4 M methanol (inset graph), indicating superior  
337 tolerance of methanol. The high concentration tolerance could be attributed to the quick  
338 conversion from intermediate that poisoning the electrode to the final CO<sub>2</sub> and H<sub>2</sub>O. Assembled  
339 elements with hybridized d orbitals strengthen electronic interaction among the different  
340 components so that accelerate the redox process. These factors lead to enhanced catalytic  
341 performance of the catalyst.

342

### 343 **{M<sub>20</sub>} Library Synthesis Details**

#### 344 **Synthesis of M20-7**

345 A measured amount of trimethylamine (800 μL) was added to the mixture of Cu(OAc)<sub>2</sub>·H<sub>2</sub>O

346 (0.1996 g, 1 mmol) Ni(OAc)<sub>2</sub>·4H<sub>2</sub>O (0.3732 g, 1.5 mmol) in CH<sub>3</sub>CN (20 mL). The solution  
347 was stirred at room temperature for 24 h and then filtered. The filtrate was evaporated to  
348 give green solid in two days. Recrystallization in CH<sub>3</sub>OH produces single crystals suitable for  
349 X-ray analysis. Yield: ca. 60 % (based on Cu). Elemental analysis found (%) for Cu<sub>10.38</sub>Ni<sub>9.62</sub>:  
350 Cu 18.5071, Ni 15.8391.

351

352

### 353 **Synthesis of M20-9**

354 A measured amount of triethylamine (800 μL) and H<sub>2</sub>O (100 μL) were added to the mixture of  
355 Cu(OAc)<sub>2</sub>·H<sub>2</sub>O (0.1996 g, 1 mmol), Co(OAc)<sub>2</sub>·4H<sub>2</sub>O (0.2491 g, 1 mmol) in CH<sub>3</sub>CN (20 mL).  
356 The solution was stirred at room temperature for 24 h to form a gel, added CH<sub>3</sub>OH (10 mL).  
357 The filtrate was evaporated to give well-formed dark gray crystals in one week. The crystals  
358 were collected by filtration, washed with MeOH and air-dried. Yield: ca. 60 % (based on Cu).  
359 Elemental analysis found (%) for Cu<sub>10.77</sub>Co<sub>9.23</sub>: Cu 23.2214, Co 18.4736.

360

### 361 **Synthesis of M20-10**

362 A measured amount of triethylamine (800 μL) and H<sub>2</sub>O (100 μL) were added to the mixture of  
363 Cu(OAc)<sub>2</sub>·H<sub>2</sub>O (0.1996 g, 1 mmol), Co(OAc)<sub>2</sub>·4H<sub>2</sub>O (0.3737 g, 1.5 mmol) in CH<sub>3</sub>CN (20 mL).  
364 The solution was stirred at room temperature for 24 hours to form a gel, added CH<sub>3</sub>OH (10 mL).  
365 The filtrate was evaporated to give well-formed dark gray crystals in one week. The crystals  
366 were collected by filtration, washed with MeOH and air-dried. Yield: ca. 60 % (based on Cu).  
367 Elemental analysis found (%) for Cu<sub>9.80</sub>Co<sub>10.20</sub>: Cu 22.2018, Co 21.4283.

368

### 369 **Synthesis of M20-17**

370 A measured amount of *iso*-C<sub>3</sub>H<sub>7</sub>NH<sub>2</sub> (400 μL) and H<sub>2</sub>O (400 μL) were added to the mixture of  
371 Cu(OAc)<sub>2</sub>·H<sub>2</sub>O (0.5988 g, 3 mmol), Ni(OAc)<sub>2</sub>·4H<sub>2</sub>O (0.4976 g, 2 mmol), Co(OAc)<sub>2</sub>·4H<sub>2</sub>O  
372 (0.7473 g, 3 mmol) in CH<sub>3</sub>CN (20 mL). The solution was stirred at room temperature for 24  
373 h, added CH<sub>3</sub>OH (20 mL). The filtrate was evaporated to give dark powder crystal in a week.  
374 Recrystallization in CH<sub>3</sub>OH produces single crystals suitable for X-ray analysis. After several  
375 days, the gray crystals were obtained by filtration, washed with CH<sub>3</sub>CH<sub>2</sub>OH and air-dried.  
376 Yield: ca. 60 % (based on Cu). Elemental analysis found (%) for Cu<sub>10.19</sub>Ni<sub>4.91</sub>Co<sub>4.90</sub>: Cu 20.8225,  
377 Ni 9.2662, Co 9.29562.

378

379

#### 380 **Synthesis of M20-19**

381 A mixture of  $\text{Cu}(\text{OAc})_2 \cdot \text{H}_2\text{O}$  (0.1996 g, 1 mmol),  $\text{Co}(\text{OAc})_2 \cdot 4\text{H}_2\text{O}$  (0.2491 g, 1mmol),  
382  $\text{Ni}(\text{OAc})_2 \cdot 4\text{H}_2\text{O}$  (0.2485 g, 1 mmol),  $\text{Zn}(\text{OAc})_2 \cdot \text{H}_2\text{O}$  (0.2195 g, 1 mmol) was dissolved in  $\text{CH}_3\text{CN}$   
383 (20 mL). Gradually added in triethylamine (2 ml) and  $\text{H}_2\text{O}$  (400  $\mu\text{L}$ ) while stirring. The mixture  
384 was stirred at room temperature for 24 h. The filtrate was evaporated to give well-formed gel in  
385 a week. Recrystallization in  $\text{CH}_3\text{OH}$  twice produces single crystals suitable for X-ray analysis.  
386 After several days, the gray crystals were obtained by filtration, washed with  $\text{CH}_3\text{CH}_2\text{OH}$  and  
387 air-dried. Yield: ca. 60 % (based on Cu). Elemental analysis found (%) for  $\text{Cu}_{10.57}\text{Ni}_{5.63}\text{Co}_{3.14}\text{Zn}_{0.67}$ :  
388 Cu 25.0532, Ni 12.3184, Co 6.8893, Zn 1.6524.

389

390

#### 391 **Synthesis of M20-20**

392 A mixture of  $\text{Cu}(\text{OAc})_2 \cdot \text{H}_2\text{O}$  (1.1976 g, 6 mmol),  $\text{Co}(\text{OAc})_2 \cdot 4\text{H}_2\text{O}$  (0.2491 g, 1mmol),  
393  $\text{Ni}(\text{OAc})_2 \cdot 4\text{H}_2\text{O}$  (0.2485 g, 1 mmol),  $\text{Zn}(\text{OAc})_2 \cdot \text{H}_2\text{O}$  (0.2195 g, 1 mmol),  $\text{Mn}(\text{OAc})_2 \cdot 4\text{H}_2\text{O}$  (0.2451  
394 g, 1 mmol) was dissolved in  $\text{CH}_3\text{CN}$  (20 mL). Gradually added in *iso*- $\text{C}_3\text{H}_7\text{NH}_2$  (2 ml) and  $\text{H}_2\text{O}$   
395 (400  $\mu\text{L}$ ) while stirring. The mixture was stirred at room temperature for 24 h. The filtrate was  
396 evaporated to give well-formed gel in a week. Recrystallization in  $\text{CH}_3\text{OH}$  twice produces single  
397 crystals suitable for X-ray analysis. After several days, the gray crystals were obtained by  
398 filtration, washed with  $\text{CH}_3\text{CH}_2\text{OH}$  and air-dried. Yield: ca. 60 % (based on Cu). Elemental  
399 analysis found (%) for  $\text{Cu}_{12.89}\text{Ni}_{2.93}\text{Co}_{2.88}\text{Zn}_{1.12}\text{Mn}_{0.18}$ : Cu 27.3165, Ni 5.7244, Co 5.6515, Zn  
400 2.4446, Mn 0.3297.

401

#### 402 **Synthesis of M20-21**

403 A mixture of  $\text{Cu}(\text{OAc})_2 \cdot \text{H}_2\text{O}$  (0.7984 g, 4 mmol),  $\text{Co}(\text{OAc})_2 \cdot 4\text{H}_2\text{O}$  (0.4982 g, 2mmol),  
404  $\text{Ni}(\text{OAc})_2 \cdot 4\text{H}_2\text{O}$  (0.4976 g, 2 mmol),  $\text{Zn}(\text{OAc})_2 \cdot \text{H}_2\text{O}$  (0.2195 g, 1 mmol),  $\text{Mn}(\text{OAc})_2 \cdot 4\text{H}_2\text{O}$  (0.2451  
405 g, 1 mmol) was dissolved in  $\text{CH}_3\text{CN}$  (20 mL). Gradually added in *iso*- $\text{C}_3\text{H}_7\text{NH}_2$  (2 ml) and  $\text{H}_2\text{O}$   
406 (400  $\mu\text{L}$ ) while stirring. The mixture was stirred at room temperature for 24 h. The filtrate was  
407 evaporated to give well-formed gel in a week. Recrystallization in  $\text{CH}_3\text{OH}$  twice produces single  
408 crystals suitable for X-ray analysis. After several days, the gray crystals were obtained by  
409 filtration, washed with  $\text{CH}_3\text{CH}_2\text{OH}$  and air-dried. Yield: ca.60 % (based on Cu). Elemental

410 analysis found (%) for  $\text{Cu}_{9.98}\text{Ni}_{5.16}\text{Co}_{4.35}\text{Zn}_{0.41}\text{Mn}_{0.10}$ : Cu 21.4387, Ni 10.2348, Co 8.6753, Zn  
411 0.9112, Mn 0.1847.

412

#### 413 **Synthesis of M20-22**

414 A mixture of  $\text{Cu}(\text{OAc})_2 \cdot \text{H}_2\text{O}$  (0.5988 g, 3 mmol),  $\text{Co}(\text{OAc})_2 \cdot 4\text{H}_2\text{O}$  (0.7473 g, 3mmol),  
415  $\text{Ni}(\text{OAc})_2 \cdot 4\text{H}_2\text{O}$  (0.4976 g, 2 mmol),  $\text{Zn}(\text{OAc})_2 \cdot \text{H}_2\text{O}$  (0.2195 g, 1 mmol),  $\text{Mn}(\text{OAc})_2 \cdot 4\text{H}_2\text{O}$  (0.2451  
416 g, 1 mmol) was dissolved in  $\text{CH}_3\text{CN}$  (20 mL). Gradually added in *iso*- $\text{C}_3\text{H}_7\text{NH}_2$  (2 ml) and  $\text{H}_2\text{O}$   
417 (400  $\mu\text{L}$ ) while stirring. The mixture was stirred at room temperature for 24 h. The filtrate was  
418 evaporated to give well-formed gel in a week. Recrystallization in  $\text{CH}_3\text{OH}$  twice produces single  
419 crystals suitable for X-ray analysis. After several days, the gray crystals were obtained by  
420 filtration, washed with  $\text{CH}_3\text{CH}_2\text{OH}$  and air-dried. Yield: ca.60 % (based on Cu). Elemental  
421 analysis found (%) for  $\text{Cu}_{9.06}\text{Ni}_{4.93}\text{Co}_{5.63}\text{Zn}_{0.23}\text{Mn}_{0.15}$ : Cu 20.2308, Ni 10.1665, Co 11.6568, Zn  
422 0.5211, Mn 0.2983.

423

424

#### 425 **Synthesis of M20-23**

426 A mixture of  $\text{Cu}(\text{OAc})_2 \cdot \text{H}_2\text{O}$  (0.3992 g, 2 mmol),  $\text{Co}(\text{OAc})_2 \cdot 4\text{H}_2\text{O}$  (0.4982 g, 2mmol),  
427  $\text{Ni}(\text{OAc})_2 \cdot 4\text{H}_2\text{O}$  (0.4976 g, 2 mmol),  $\text{Zn}(\text{OAc})_2 \cdot \text{H}_2\text{O}$  (0.4390 g, 2 mmol),  $\text{Mn}(\text{OAc})_2 \cdot 4\text{H}_2\text{O}$  (0.2451  
428 g, 2 mmol) was dissolved in  $\text{CH}_3\text{CN}$  (20 mL). Gradually added in *iso*- $\text{C}_3\text{H}_7\text{NH}_2$  (2 ml) and  $\text{H}_2\text{O}$   
429 (400  $\mu\text{L}$ ) while stirring. The mixture was stirred at room temperature for 24 h. The filtrate was  
430 evaporated to give well-formed gel in a week. Recrystallization in  $\text{CH}_3\text{OH}$  twice produces single  
431 crystals suitable for X-ray analysis. After several days, the gray crystals were obtained by  
432 filtration, washed with  $\text{CH}_3\text{CH}_2\text{OH}$  and air-dried. Yield: ca.60 % (based on Cu). Elemental  
433 analysis found (%) for  $\text{Cu}_{9.37}\text{Ni}_{6.01}\text{Co}_{4.10}\text{Zn}_{0.39}\text{Mn}_{0.12}$ : Cu 20.0480, Ni 11.8846, Co 8.1353, Zn  
434 0.8673, Mn 0.2301.

435

#### 436 **Synthesis of M20-24**

437 A mixture of  $\text{Cu}(\text{OAc})_2 \cdot \text{H}_2\text{O}$  (1.1976 g, 6 mmol),  $\text{Co}(\text{OAc})_2 \cdot 4\text{H}_2\text{O}$  (0.2491 g, 1 mmol),  
438  $\text{Ni}(\text{OAc})_2 \cdot 4\text{H}_2\text{O}$  (0.4976 g, 1 mmol),  $\text{Zn}(\text{OAc})_2 \cdot \text{H}_2\text{O}$  (0.2195 g, 1 mmol),  $\text{Mn}(\text{OAc})_2 \cdot 4\text{H}_2\text{O}$  (0.2451  
439 g, 1 mmol) was dissolved in  $\text{CH}_3\text{CN}$  (20 mL). Gradually added in triethylamine (2 ml) and  $\text{H}_2\text{O}$   
440 (400  $\mu\text{L}$ ) while stirring. The mixture was stirred at room temperature for 24 h. The filtrate was  
441 evaporated to give well-formed gel in a week. Recrystallization in  $\text{CH}_3\text{OH}$  twice produces single



442 crystals suitable for X-ray analysis. After several days, the gray crystals were obtained by  
443 filtration, washed with CH<sub>3</sub>CH<sub>2</sub>OH and air-dried. Yield: ca.60 % (based on Cu). Elemental  
444 analysis found (%) for Cu<sub>11.55</sub>Ni<sub>3.99</sub>Co<sub>3.39</sub>Zn<sub>0.74</sub>Mn<sub>0.44</sub>: (a) Cu 26.2967, Ni 8.0627, Co 7.1332, Zn  
445 1.4970, Mn 0.9674; (b) Cu 27.6739, Ni 8.3407, Co 7.2818, Zn 2.1253, Mn 0.8846; (c) Cu  
446 22.9484, Ni 7.6913, Co 6.4329, Zn 1.5176, Mn 0.6787.

447

#### 448 **Synthesis of M20-25**

449 A mixture of Cu(OAc)<sub>2</sub>·H<sub>2</sub>O (0.7984 g, 4 mmol), Co(OAc)<sub>2</sub>·4H<sub>2</sub>O (0.4982 g, 2 mmol),  
450 Ni(OAc)<sub>2</sub>·4H<sub>2</sub>O (0.4976 g, 2 mmol), Zn(OAc)<sub>2</sub>·H<sub>2</sub>O (0.2195 g, 1 mmol), Mn(OAc)<sub>2</sub>·4H<sub>2</sub>O (0.2451  
451 g, 1 mmol) was dissolved in CH<sub>3</sub>CN (20 mL). Gradually added in triethylamine (2 ml) and H<sub>2</sub>O  
452 (400 μL) while stirring. The mixture was stirred at room temperature for 24 h. The filtrate was  
453 evaporated to give well-formed gel in a week. Recrystallization in CH<sub>3</sub>OH twice produces single  
454 crystals suitable for X-ray analysis. After several days, the gray crystals were obtained by  
455 filtration, washed with CH<sub>3</sub>CH<sub>2</sub>OH and air-dried. Yield: ca. 60 % (based on Cu). Elemental  
456 analysis found (%) for Cu<sub>10.16</sub>Ni<sub>5.12</sub>Co<sub>3.98</sub>Zn<sub>0.26</sub>Mn<sub>0.48</sub>: Cu 21.4963, Ni 10.0089, Co 7.8094, Zn  
457 0.5701, Mn 0.8711.

458

#### 459 **Synthesis of M20-26**

460 A mixture of Cu(OAc)<sub>2</sub>·H<sub>2</sub>O (0.5988 g, 3 mmol), Co(OAc)<sub>2</sub>·4H<sub>2</sub>O (0.4982 g, 2 mmol),  
461 Ni(OAc)<sub>2</sub>·4H<sub>2</sub>O (0.7464 g, 3 mmol), Zn(OAc)<sub>2</sub>·H<sub>2</sub>O (0.2195 g, 1 mmol), Mn(OAc)<sub>2</sub>·4H<sub>2</sub>O (0.2451  
462 g, 1 mmol) was dissolved in CH<sub>3</sub>CN (20 mL). Gradually added in triethylamine (2 ml) and H<sub>2</sub>O  
463 (400 μL) while stirring. The mixture was stirred at room temperature for 24 h. The filtrate was  
464 evaporated to give well-formed gel in a week. Recrystallization in CH<sub>3</sub>OH twice produces single  
465 crystals suitable for X-ray analysis. After several days, the gray crystals were obtained by  
466 filtration, washed with CH<sub>3</sub>CH<sub>2</sub>OH and air-dried. Yield: ca. 60 % (based on Cu). Elemental  
467 analysis found (%) for Cu<sub>9.68</sub>Ni<sub>4.45</sub>Co<sub>5.19</sub>Zn<sub>0.20</sub>Mn<sub>0.48</sub>: Cu 20.4417, Ni 8.6738, Co 10.1624, Zn  
468 0.4435, Mn 0.8723.

469

#### 470 **References**

- 471 1. G. Sheldrick, *University of Göttingen, Göttingen, Germany (2008)*, 1997.
- 472 2. Y. Sun, Y. Zhou, C. Zhu, W. Tu, H. Wang, H. Huang, Y. Liu, M. Shao, J. Zhong, S.-  
473 T. Lee and Z. Kang, *Appl. Catal., B*, 2019, **244**, 795-801.

- 474 3. X. Cui, P. Xiao, J. Wang, M. Zhou, W. Guo, Y. Yang, Y. He, Z. Wang, Y. Yang and  
475 Y. Zhang, *Angew. Chem. Int. Ed.*, 2017, **129**, 4559-4564.
- 476 4. F. Chen, N. Wu, M. Zhai, X. Zhang, R. Guo, T. Hu and M. Ma, *J. Energy Chem.*,  
477 2021, **58**, 247-255.
- 478 5. W. Tong, Q. Shao, P. Wang and X. Huang, *Chem. Eur. J.*, 2019, **25**, 7218-7224.
- 479 6. L. Chen, Z. Hua, J. Shi and M. He, *ACS Appl. Mater. Interfaces*, 2018, **10**, 39002-  
480 39008.
- 481 7. D. Wu, W. Zhang and D. Cheng, *ACS Appl. Mater. Interfaces*, 2017, **9**, 19843-19851.
- 482 8. A. P. M. Udayan and S. N. Sawant, *J. Phys. Chem. Solids*, 2021, **150**, 109883.
- 483 9. S. Anantharaj, H. Sugime, S. Yamaoka and S. Noda, *ACS Appl. Energy Mater.*, 2021,  
484 **4**, 899-912.
- 485 10. S. Anantharaj, H. Sugime and S. Noda, *ACS Appl. Mater. Interfaces*, 2020, **12**,  
486 27327-27338.
- 487 11. G. S. Theres, G. Velayutham, C. Suresh, P. S. Krishnan and K. Shanthi, *J. Appl.*  
488 *Electrochem.*, 2020, **50**, 639-653.
- 489 12. M. B. Askari and P. Salarizadeh, *J. Mol. Liq.*, 2019, **291**, 111306.
- 490 13. N. Ullah, M. Xie, C. J. Oluigbo, Y. Xu, J. Xie, H. U. Rasheed and M. Zhang, *J.*  
491 *Electroanal. Chem.*, 2019, **838**, 7-15.
- 492 14. S. Sheikhi and F. Jalali, *Int. J. Hydrogen Energy*, 2021, **46**, 10723-10738.
- 493 15. W. Li, Z. Song, X. Deng, X.-Z. Fu and J.-L. Luo, *Electrochim. Acta*, 2020, **337**,  
494 135684.
- 495 16. R. Shi, Y. Zhang and Z. Wang, *J. Alloys Compd.*, 2019, **810**, 151879.
- 496 17. A. A. Dubale, Y. Zheng, H. Wang, R. Hübner, Y. Li, J. Yang, J. Zhang, N. K. Sethi,  
497 L. He, Z. Zheng and W. Liu, *Angew. Chem., Int. Ed.*, 2020, **59**, 13891-13899.
- 498 18. S. Anantharaj, H. Sugime and S. Noda, *ACS Appl. Mater. Interfaces*, 2020, **12**,  
499 27327-27338.
- 500 19. M. Wang, C. Wang, L. Zhu, F. Rong, L. He, Y. Lou and Z. Zhang, *Appl. Catal., A*,  
501 2021, **619**, 118159.
